# Supplementary material
Source: PubMed Central journal article supplement (PMC6895516)
Supplement: ajtr0011-7126-f5.pdf [file ajtr0011-7126-f5.pdf]

# Gene delivery with nanomicelles into T cells

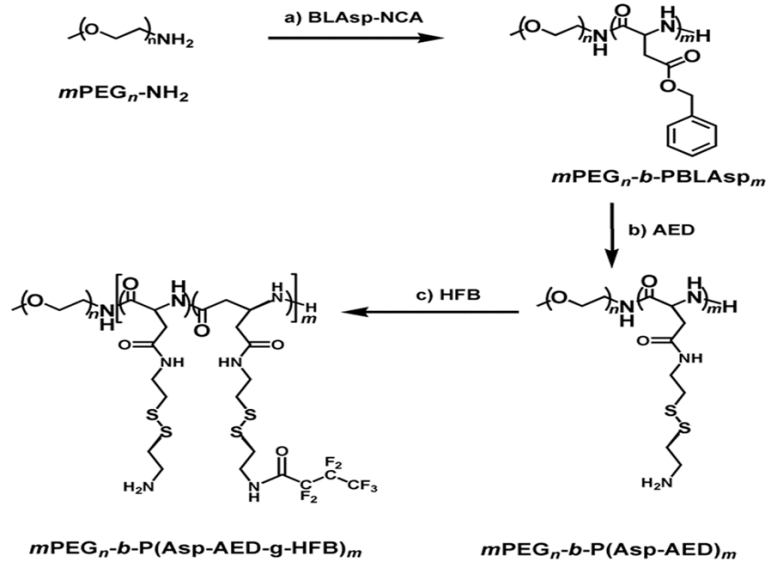

Figure S1. Synthetic route of the copolymer  $m\text{PEG-P}(\text{Asp-AED-g-HFB})$  for polyplex preparation.
